# Supplementary material for: Prussian blue analogue-derived hollow metal oxide heterostructure for high-performance supercapacitors
Source: Royal Society of Chemistry journal article supplement (doi:10.1039/d3dt01966g), 2023-01-01
Supplement: d3dt01966g1.pdf [file d3dt01966g1.pdf]

## Supporting Information

### Prussian Blue Analogue Derived Hollow Metal Oxide Heterostructure for High-Performance Supercapacitor

Hui Ju<sup>a, b</sup>, Qianqian Tang<sup>a</sup>, Yong Xu<sup>a</sup>, Xiaojing Bai<sup>a</sup>, Chenjin Pu<sup>a</sup>, Tongchen Liu<sup>a</sup>, Shuxin Liu<sup>a, \*</sup>,  
Lin Zhang<sup>b</sup>

<sup>a</sup>College of Chemistry and Chemical Engineering, Mianyang Teachers' College, Mianyang, 621900, China.

<sup>b</sup>Research Centre of Laser Fusion, China Academy of Engineering Physics, Mianyang, 621900, China.

**\*Corresponding author:** E-mail address: liushuxin88@126.com

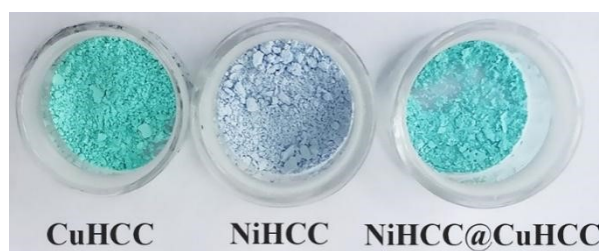

Figure S1 Photographs of CuHCC, NiHCC and NiHCC@CuHCC

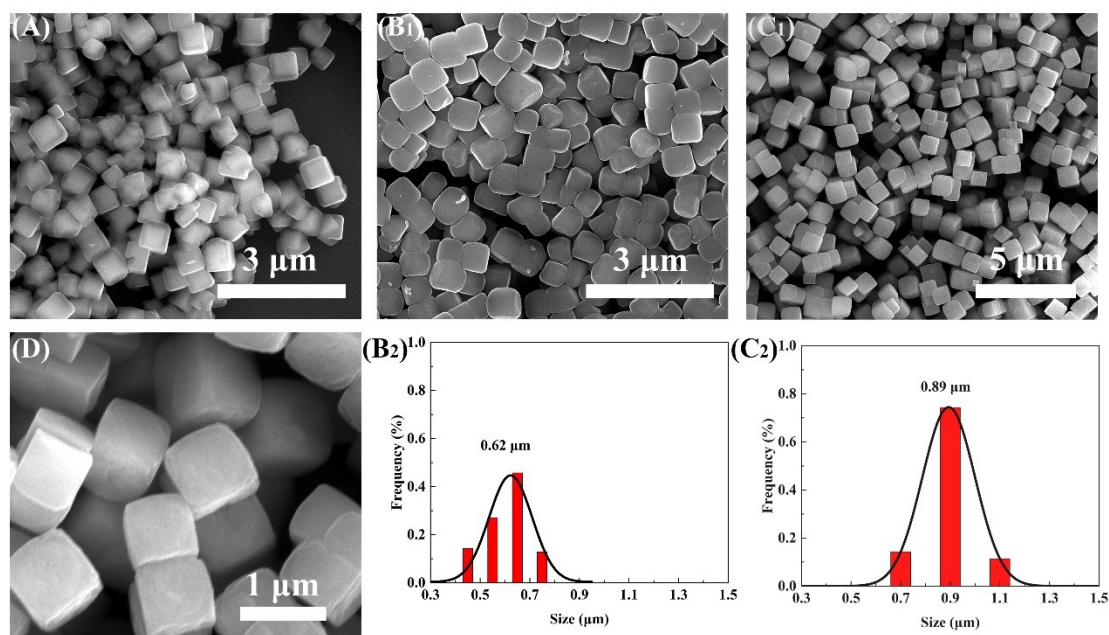

Figure S2 The FESEM images of (A) CuHCC, (B<sub>1</sub>) NiHCC and (C<sub>1</sub>, D) NiHCC@CuHCC, the size distribution of (B<sub>2</sub>) NiHCC and (C<sub>2</sub>) NiHCC@CuHCC

Table S1 Electrochemical performances of MOFs- derived metal oxides for SC electrodes

| Material                                                                            | Specific capacitance / (F g <sup>-1</sup> ) | Rate performance/(%)            | Cycling stability     | Refs.     |
|-------------------------------------------------------------------------------------|---------------------------------------------|---------------------------------|-----------------------|-----------|
| MnO <sub>x</sub>                                                                    | 75.6 (0.1 A g <sup>-1</sup> )               | 23.8% (2 A g <sup>-1</sup> )    | 426% (500 cycles)     | 1         |
| g-C <sub>3</sub> N <sub>4</sub> /CeO <sub>2</sub> /CoFe <sub>2</sub> O <sub>4</sub> | 255.5 (1 A g <sup>-1</sup> )                | 56.7%                           | —                     | 2         |
| WO <sub>3</sub> @CuO                                                                | 248.0 (1 A g <sup>-1</sup> )                | 58.8% (10 A g <sup>-1</sup> )   | 85.2% (1500 cycles)   | 3         |
| Co <sub>3</sub> O <sub>4</sub>                                                      | 115.0 (1 A g <sup>-1</sup> )                | 65.2% (10 A g <sup>-1</sup> )   | 62.6% (10,000 cycles) | 4         |
| Co <sub>3</sub> O <sub>4</sub> microflowers                                         | 240.2 (0.625 A g <sup>-1</sup> )            | 84.1% (6.25 A g <sup>-1</sup> ) | 96.3% (5,000 cycles)  | 5         |
| Cr <sub>2</sub> O <sub>3</sub> nanoribbons                                          | 291 (0.25 A g <sup>-1</sup> )               | 35.4% (2 A g <sup>-1</sup> )    | 99.5% (3000 cycles)   | 6         |
| Co <sub>3</sub> O <sub>4</sub> nanocages                                            | 140.0 (10 A g <sup>-1</sup> )               | 49.5% (15 A g <sup>-1</sup> )   | —                     | 7         |
| Cuo/NiO/Co <sub>3</sub> O <sub>4</sub>                                              | 262.5 (1 A g <sup>-1</sup> )                | 60.3% (10 A g <sup>-1</sup> )   | 107.9% (3000 cycles)  | This work |

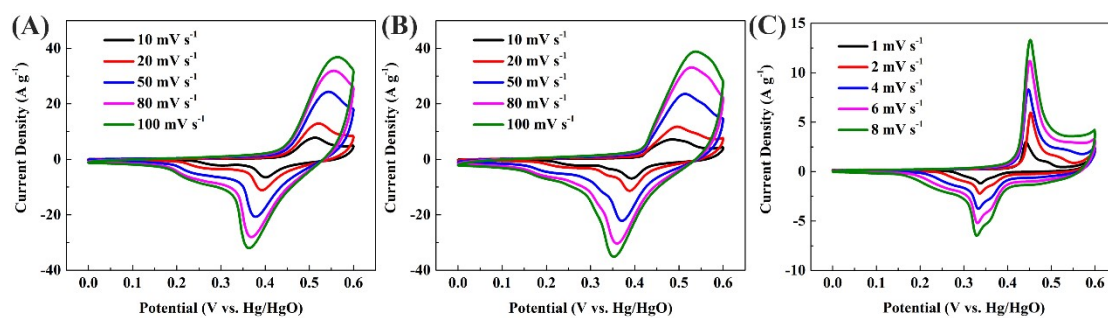

Figure S3 CV curves at various scan rates of 10-100  $\text{mV s}^{-1}$  of (A)  $\text{CuO}/\text{Co}_3\text{O}_4$  and (B)  $\text{NiO}/\text{Co}_3\text{O}_4$ . (C) CV curves at various scan rates of 1-8  $\text{mV s}^{-1}$  of  $\text{CuO}/\text{NiO}/\text{Co}_3\text{O}_4$

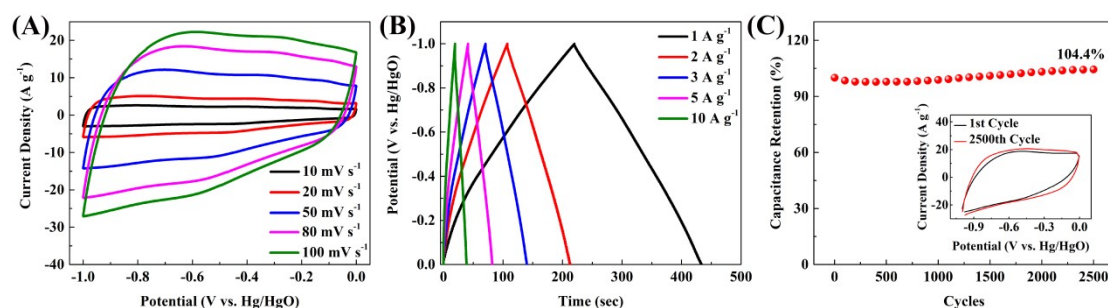

Figure S4 (A) CV curves of NDGH at various scan rates from 10 to 100  $\text{mV s}^{-1}$ , (B) GCD curves of NDGH at different current densities of 1-10  $\text{A g}^{-1}$ , (C) Cycling stability of NDGH (inset: CV curves of NDGH for the 1st and 2500th cycles)

Table S2 Electrochemical performances of reported ASCs

| System                                                                 | Specific capacitance/ $(\text{F g}^{-1})$ | Rate performance/(%)          | Cycling stability     | Refs. |
|------------------------------------------------------------------------|-------------------------------------------|-------------------------------|-----------------------|-------|
| CNF@Ni-CAT//AC                                                         | 68.58 (0.5 $\text{A g}^{-1}$ )            | 65% (10 $\text{A g}^{-1}$ )   | 106.19% (5000 cycles) | 8     |
| $\text{MnO}_2$ //AC                                                    | 50 (0.25 $\text{A g}^{-1}$ )              | —                             | 90.4% (3000 cycles)   | 9     |
| $\text{Mn}_{1.5}\text{Co}_{0.75}\text{O}/\text{NF}/\text{Graphene}$    | 69 (0.5 $\text{A g}^{-1}$ )               | 59.9% (10 $\text{A g}^{-1}$ ) | 86% (10000 cycles)    | 10    |
| cP/rGO/Co <sub>9</sub> S <sub>8</sub> //AC                             | 55 (0.5 $\text{A g}^{-1}$ )               | —                             | 94.2% (10000 cycles)  | 11    |
| $\text{ZnCo}_2\text{O}_4$ //Nanoporous Carbon                          | 94.4 (0.5 $\text{A g}^{-1}$ )             | —                             | 87.2% (5000 cycles)   | 12    |
| IL-CNT-rGO// $\text{MnO}_2$ -rGO                                       | 57 (1 $\text{A g}^{-1}$ )                 | 70% (20 $\text{A g}^{-1}$ )   | 90% (10000 cycles)    | 13    |
| $\text{Ni-MOF}/\text{CNTs-5}/\text{rGO}/\text{C}_3\text{N}_4\text{-3}$ | 103 (0.5 $\text{A g}^{-1}$ )              | 45% (20 $\text{A g}^{-1}$ )   | 95% (5000 cycles)     | 14    |
| NCMO//NC                                                               | 76.3 (1 $\text{A g}^{-1}$ )               | 69.3% (10 $\text{A g}^{-1}$ ) | 92.6% (10000 cycles)  | 15    |
| $\text{MnO}_2$ /rGO//rGO                                               | 59.6 (1 $\text{A g}^{-1}$ )               | 86.9% (8 $\text{A g}^{-1}$ )  | 89.4% (1000 cycles)   | 16    |
| $\text{CuO}/\text{NiO}/\text{Co}_3\text{O}_4$ //NDGH                   | 76.3 (1 $\text{A g}^{-1}$ )               | 60.9% (10 $\text{A g}^{-1}$ ) | 100.7% (1000 cycles)  | This  |

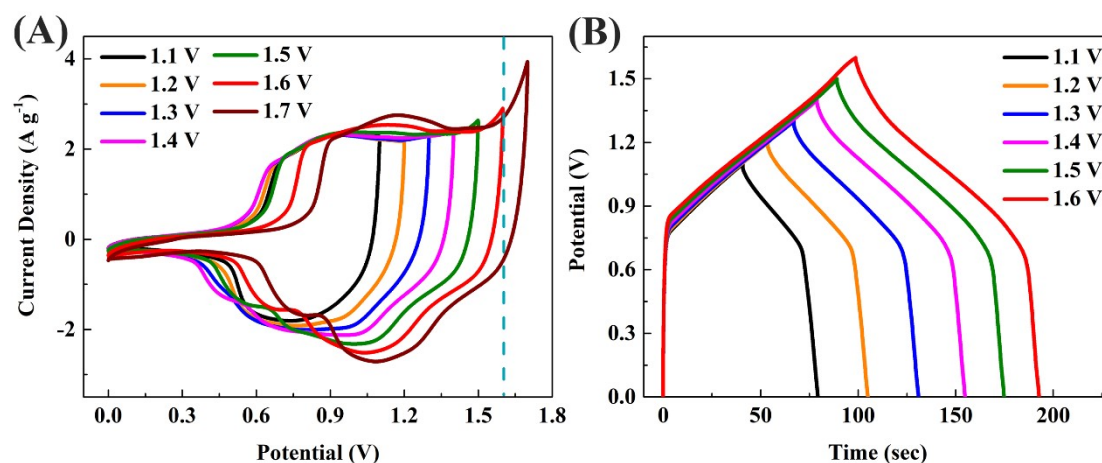

Figure S5 (A) CV curves at different potential ranges at a scan rate of  $20 \text{ mV s}^{-1}$ . (B) GCD curves at different potential ranges at a current density of  $1 \text{ A g}^{-1}$

## References

1. L. D. Chen, Y. Q. Zheng and H. L. Zhu, *J. Mater. Sci.*, 2017, **53**, 1346-1355.
2. B. Chameh, N. Khosroshahi, M. Bakhtian, M. Moradi and V. Safarifarad, *Ceram. Int.*, 2022, **48**, 22254-22265.
3. J. Tian, B. Lin, Y. Sun, X. Zhang and H. Yang, *Mater. Lett.*, 2017, **206**, 91-94.
4. S. Chen, M. Xue, Y. Li, Y. Pan, L. Zhu and S. Qiu, *J. Mater. Chem. A*, 2015, **3**, 20145-20152.
5. G.-C. Li, X.-N. Hua, P.-F. Liu, Y.-X. Xie and L. Han, *Mater. Chem. Phys.*, 2015, **168**, 127-131.
6. S. Ullah, I. A. Khan, M. Choucair, A. Badshah, I. Khan and M. A. Nadeem, *Electrochim. Acta*, 2015, **171**, 142-149.
7. H. Zhang, B. Yan, C. Zhou, J. Wang, H. Duan, D. Zhang and H. Zhao, *Energy Fuels*, 2021, **32**, 16925-16932.
8. S. Zhao, H. Wu, Y. Li, Q. Li, J. Zhou, X. Yu, H. Chen, K. Tao and L. Han, *Inorg. Chem. Front.*, 2019, **6**, 1824-1830.
9. M. Huang, Y. Zhang, F. Li, L. Zhang, R. S. Ruoff, Z. Wen and Q. Liu, *Sci. Rep.-UK*, 2014, **4**, 3878.
10. G. Li, M. Chen, Y. Ouyang, D. Yao, L. Lu, L. Wang, X. Xia, W. Lei, S.-M. Chen, D. Mandler and Q. Hao, *Appl. Surf. Sci.*, 2019, **469**, 941-950.
11. T. Yao, Y. Li, D. Liu, Y. Gu, S. Qin, X. Guo, H. Guo, Y. Ding, Q. Liu, Q. Chen, J. Li and D. He, *J. Power Sources*, 2018, **379**, 167-173.
12. D. He, Y. Gao, Y. Yao, L. Wu, J. Zhang, Z. H. Huang and M. X. Wang, *Front. Chem.*, 2020, **8**, 1-11.
13. Y. Sun, Y. Cheng, K. He, A. Zhou and H. Duan, *RSC Adv.*, 2015, **5**, 10178-10186.
14. P. Wen, P. Gong, J. Sun, J. Wang and S. Yang, *J. Mater. Chem. A*, 2015, **3**, 13874-13883.
15. X. Wei, H. Peng, Y. Li, Y. Yang, S. Xiao, L. Peng, Y. Zhang and P. Xiao, *ChemSusChem*, 2018, **11**, 3167-3174.
16. S. Wu, W. Chen and L. Yan, *J. Mater. Chem. A*, 2014, **2**, 2765-2772.
